# Supplementary material for: Assessment of Prenatal Developmental Toxicity Study of Bitter Melon Seed Extract from Supercritical Carbon Dioxide (scCO2) Extraction in Wistar Rats
Source: Research Square preprint supplement (doi:10.21203/rs.3.rs-1535333/v1), 2022-04-19
Supplement: Supplementary file 1 [file 0074947df78b2b81501c9264.pdf]

## Supporting Information

### Assessment of Prenatal Developmental Toxicity Study of Bitter Melon Seed Extract from Supercritical Carbon Dioxide (scCO<sub>2</sub>) Extraction in Wistar Rats

Wan-Yu Chung<sup>1</sup>, Hritika Nath<sup>2</sup>, Pang-Kuei Hsu<sup>1</sup>, Chen-Meng Kuan<sup>1\*</sup>

<sup>1</sup> Greenyn Biotechnology Co., Ltd., Taichung City, 42881, Taiwan

<sup>2</sup> Jai Research Foundation, Valvada, Gujarat 396105, India

\*Corresponding author: [kcmeng30@gmail.com](mailto:kcmeng30@gmail.com)

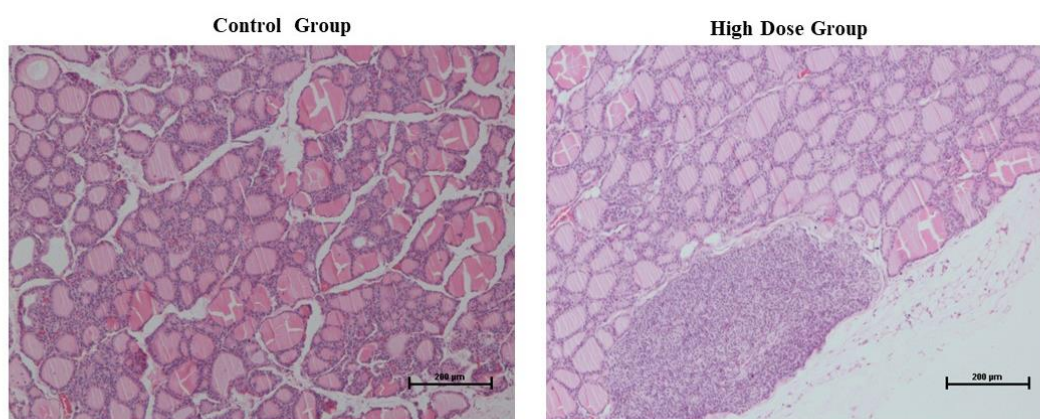

**Figure 1.** Histopathologic results of the sections of thyroid gland in the control and high dose groups.
